# Supplementary material for: Mitochondrial KATP channels contribute to the protective effects of hydrogen sulfide against impairment of central chemoreception of rat offspring exposed to maternal cigarette smoke
Source: PubMed Central journal article supplement (PMC7567348; doi:10.1371/journal.pone.0237643), 2020-10-16
Supplement: pone.0237643.s001.pdf [file pone.0237643.s001.pdf]

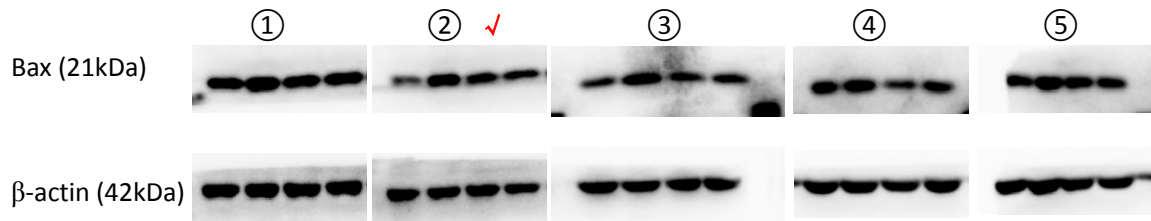

The loading order for Bax protein: Control, CS, CS+NaHS and NaHS.

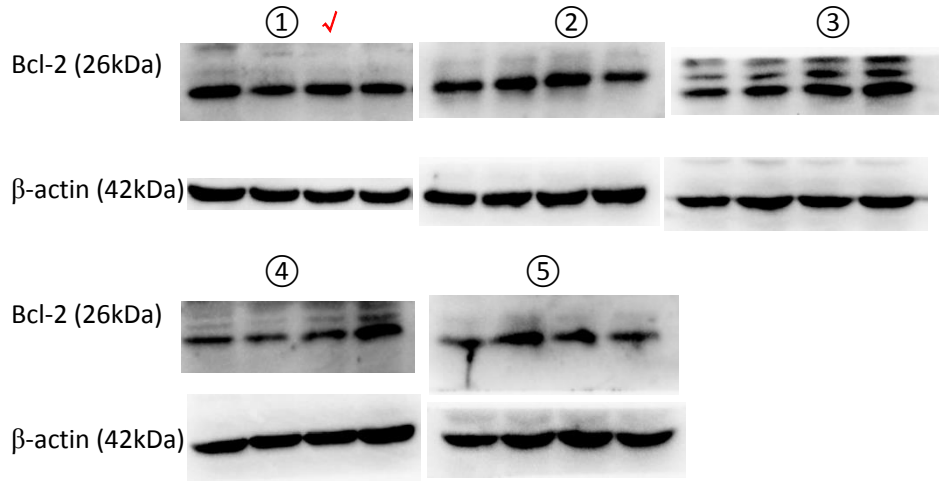

The loading order for Bcl-2 protein: Control, CS, CS+NaHS and NaHS.

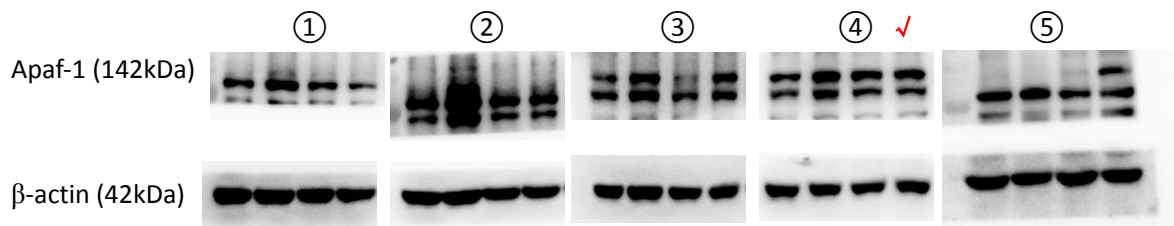

The loading order for Apaf-1 protein: Control, CS, CS+NaHS and NaHS.

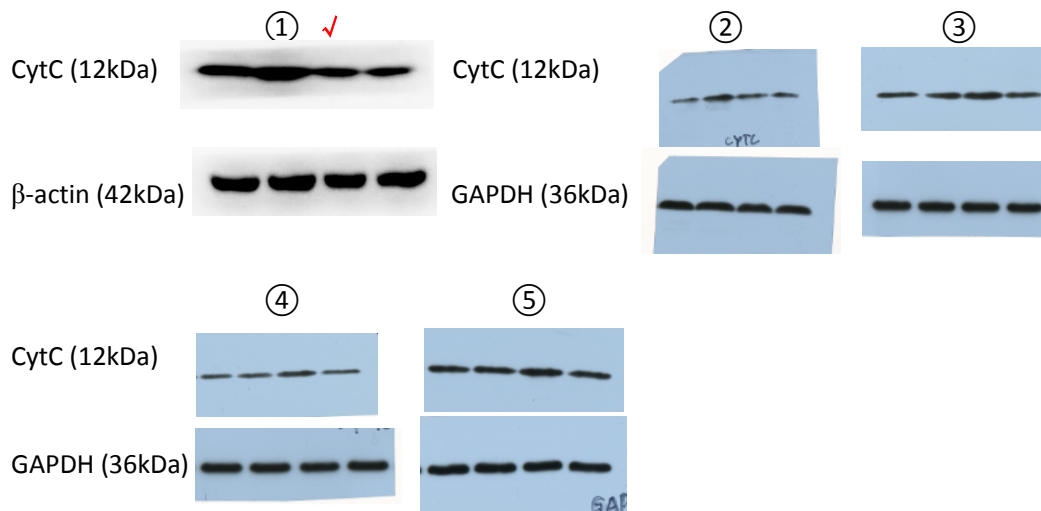

The loading order for CytC protein in panel ①-②: Control, CS, CS+NaHS and NaHS; in panel ③-⑤: Control, NaHS, CS and CS+NaHS.

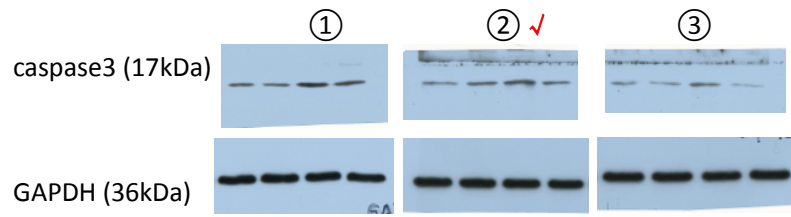

The loading order for caspase3 protein: Control, NaHS, CS and CS+NaHS.

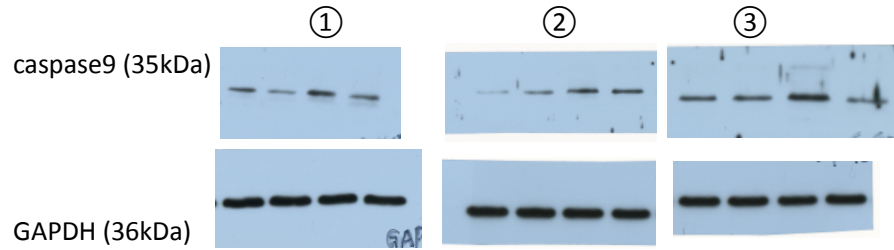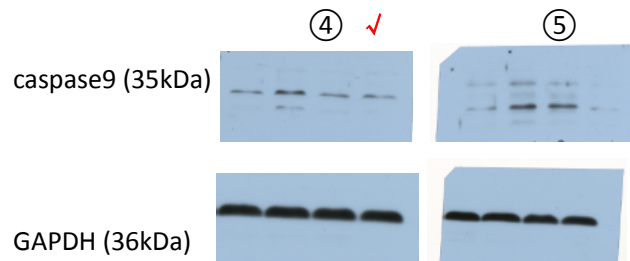

The loading order for caspase9 protein in panel ①-③: Control, NaHS, CS and CS+NaHS; in panel ④-⑤: Control, CS, CS+NaHS and NaHS.

The original images with “✓” were used in the Fig 3 for corresponding protein.
